# Supplementary material for: Cross-reactivities in conjugation reactions involving iron oxide nanoparticles
Source: publisher site journal article supplement (doi:10.3762/bjnano.16.106), 2025-08-29
Supplement: Additional file 1 [file 2190-4286-16-106-S1.pdf]

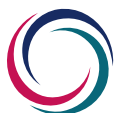

## Supporting Information

for

### **Cross-reactivities in conjugation reactions involving iron oxide nanoparticles**

Shoronia N. Cross, Katalin V. Korpany, Hanine Zakaria and Amy Szuchmacher Blum

*Beilstein J. Nanotechnol.* **2025**, *16*, 1504–1521. doi:10.3762/bjnano.16.106

**UV–vis of pure cyanine dyes, N 1s XPS spectrum of IONP-PPA, S 2p XPS spectrum of Si substrate, UV–vis of supernatant from CySH reaction and control**

## Supporting Data

UV-vis spectra of aqueous solutions of the cyanine dyes

High resolution N 1s spectrum of IONP-PPA.

XPS spectra of the bare Si wafer substrate

UV-vis of reaction supernatant from CySH reaction and control

## Number

Figure S1

Figure S2

Figure S3

Figure S4

## Page

2

2

3

3

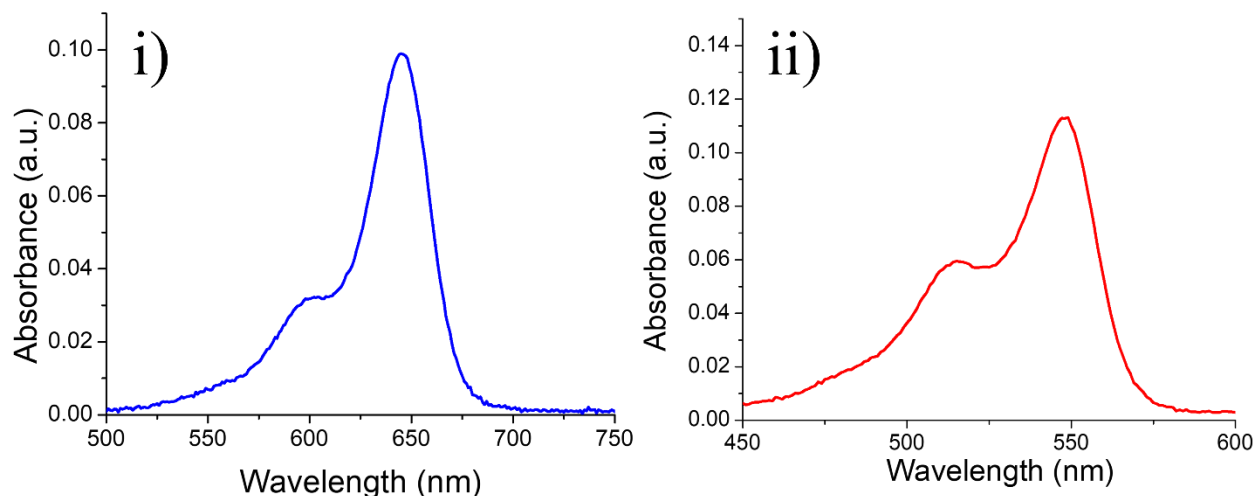

**Figure S1:** UV-vis spectra of aqueous solutions of the cyanine dyes used in this work. i) 1  $\mu$ M Sulfo-Cy5-azide in 30 mM MOPS (pH 7), and ii) 2  $\mu$ M sulfo-Cy3-maleimide in 30 mM MOPS (pH 7).

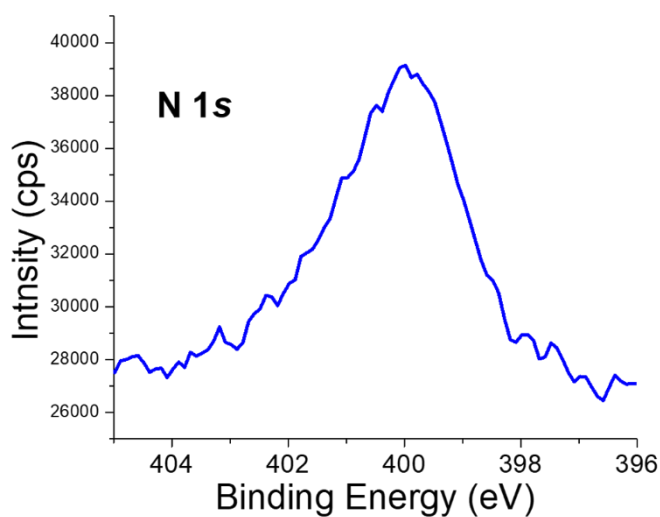

**Figure S2:** High resolution N 1s spectrum of IONP-PPA.

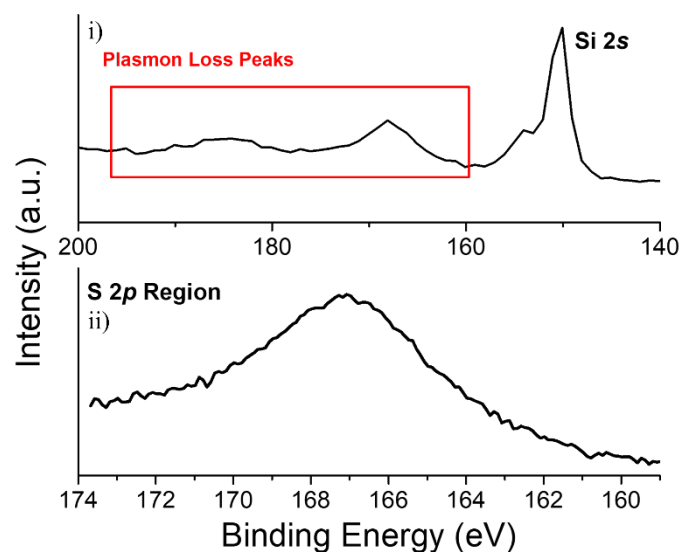

**Figure S3:** XPS spectra of the bare Si wafer substrate. i) Section of a survey spectrum illustrating the plasmon loss peaks from the Si 2s peak (red box), and ii) the high-resolution S 2p region, illustrating the broad Si 2s plasmon loss peak of the Si wafer substrate.

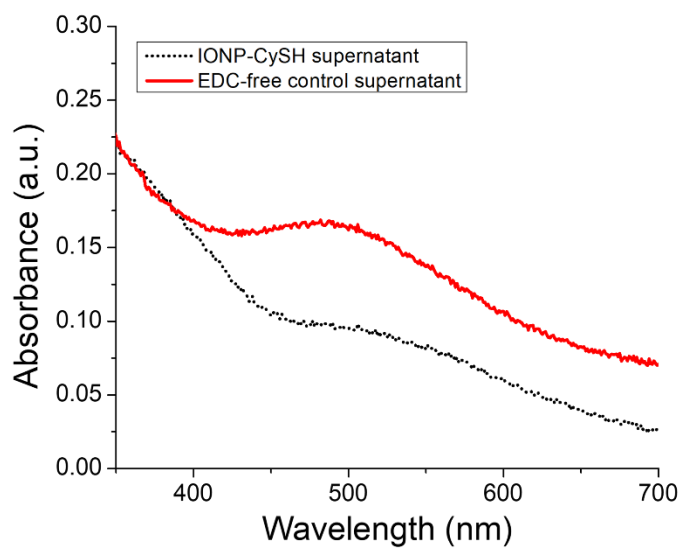

**Figure S4:** UV-vis spectrum of the reaction supernatant produced following reaction of IONP-3,4-DHBA with CySH. Red solid curve: reaction supernatant in the absence of EDC/NHS activation; black dotted curve: IONP-CySH reaction supernatant.  $\lambda_{\text{max}} = 485 \text{ nm}$ .
